# Supplementary material
Source: PubMed Central journal article supplement (PMC3422486)
Supplement: npp201270x1.pdf [file npp201270x1.pdf]

## Supplementary Figures

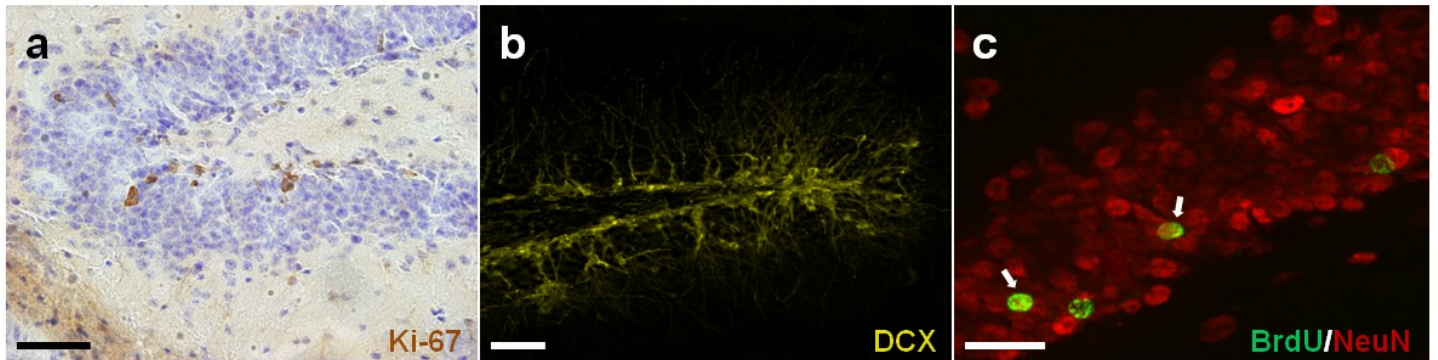

**Supplementary Figure 1** Examples of immunohistochemical analyses performed in this study. Cellular proliferation (a) was measured using Ki-67 protein marker (in brown) in the presence of cresyl violet staining (magnification bar, 50  $\mu\text{m}$ ). Immature newborn neurons (b) were quantified using DCX marker (in yellow) (magnification bar, 50  $\mu\text{m}$ ). Neuronal survival (c) was assessed by immunohistochemical staining to detect BrdU-positive cells (in green) and NeuN-positive neurons (in red) in the granule cell layer. Colocalization of BrdU with NeuN (white arrow indicate BrdU/NeuN-positive cell) allows to detect newborn mature neurons (4 weeks old) (magnification bar, 25  $\mu\text{m}$ ).

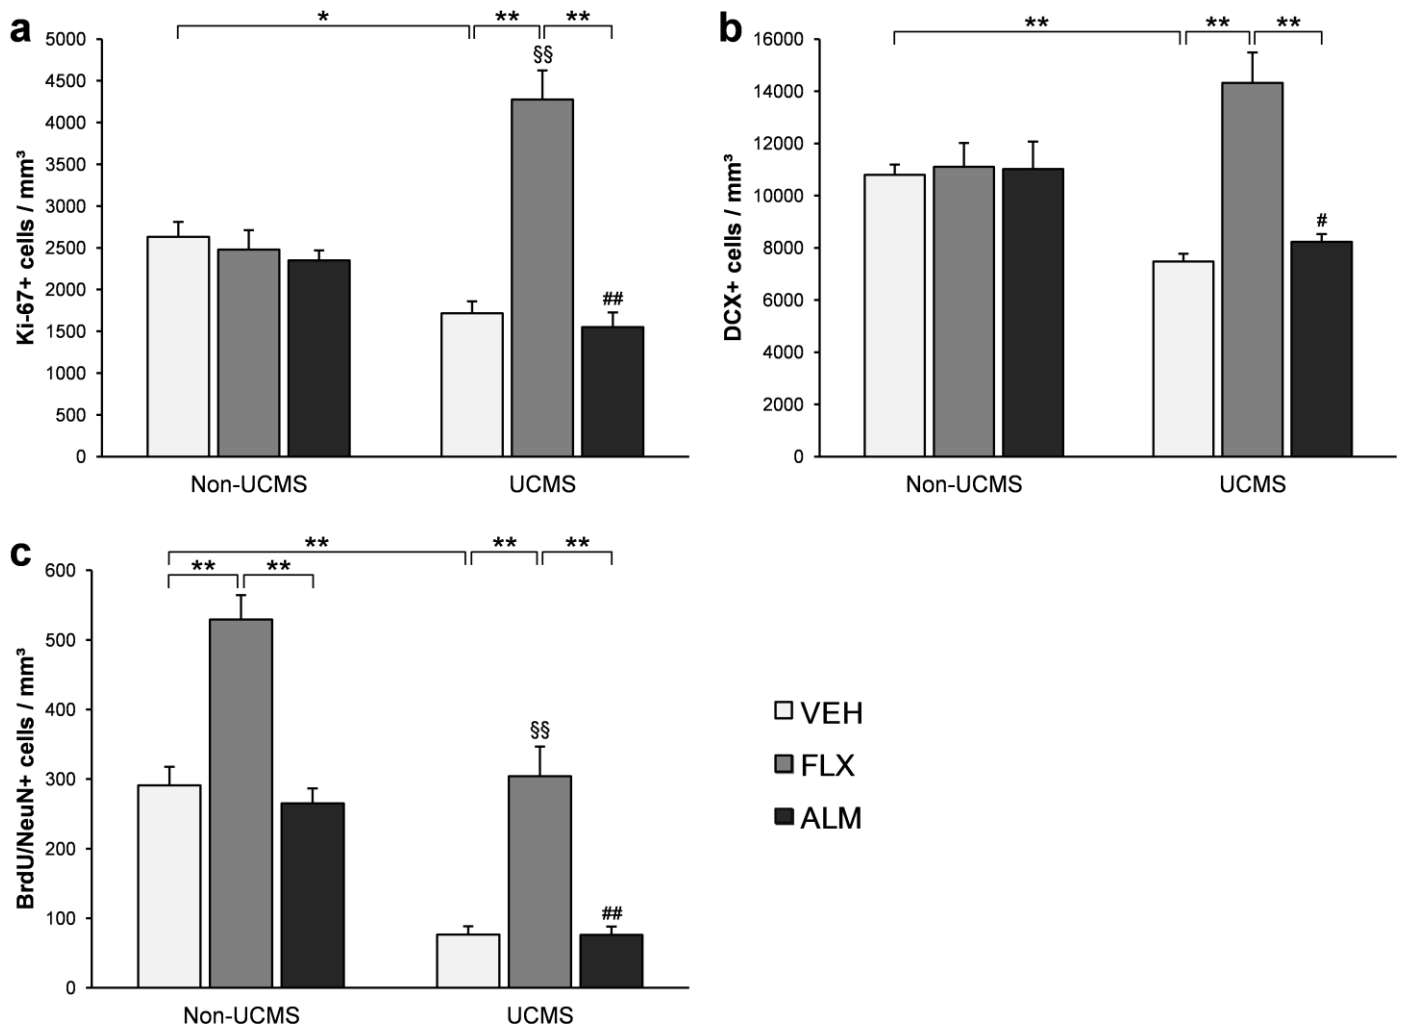

**Supplementary Figure 2** Effects of the unpredictable chronic mild stress (UCMS) and 7-week treatment with fluoxetine (FLX, 20 mg/kg/day, *per os* (p.o.)) or almorexant (ALM, 100 mg/kg/day, p.o.) on the cell proliferation, generation of immature and mature neurons in the intermediate part of the hippocampus assessed by the number of Ki-67-, DCX- and BrdU/NeuN-positive cells per mm<sup>3</sup> of the granular cell layer (GCL), respectively. (a) The UCMS induced a decrease of cell proliferation (non-UCMS/VEH group vs UCMS/VEH group), while treatment with FLX counteracted this reduction (UCMS/VEH group vs UCMS/FLX group). No effect of ALM was noticed in UCMS mice (UCMS/FLX group vs UCMS/ALM group). Furthermore, significant differences were observed between non-UCMS/FLX group vs <sup>§</sup>UCMS/FLX group and between non-UCMS/ALM group vs <sup>#</sup>UCMS/ALM group. (b) The UCMS induced a decrease of immature neurons genesis (non-UCMS/VEH group vs UCMS/VEH group), while treatment with FLX counteracted this reduction (UCMS/VEH group vs UCMS/FLX group) without effect of ALM in UCMS mice (UCMS/FLX group vs UCMS/ALM group). A significant difference was also seen between non-UCMS/ALM group vs <sup>#</sup>UCMS/ALM group. (c) The UCMS decreased the amount of mature newborn neurons (non-UCMS/VEH group vs UCMS/VEH group), whereas FLX treatment reversed this alteration (UCMS/VEH group vs UCMS/FLX group). No effect of ALM was observed (UCMS/FLX group vs UCMS/ALM group). FLX increased the proportion of mature neurons in non-UCMS mice (non-UCMS/FLX group vs non-UCMS/VEH or non-UCMS/ALM groups, and non-UCMS/FLX group vs <sup>§</sup>UCMS/FLX group). A significant difference was also seen between non-UCMS/ALM group vs <sup>#</sup>UCMS/ALM group. Data represent mean  $\pm$  SEM; one symbol  $p < 0.05$ , two symbols  $p < 0.01$ ;  $n = 8$  mice/group.
