# Supplementary material
Source: PubMed Central journal article supplement (PMC3422486)
Supplement: npp201270x2.pdf [file npp201270x2.pdf]

## Supplementary Table 1

**Supplementary Table 1.** Complete multiple comparisons for coat state analysis

| <b>Mann-Whitney <i>U</i> tests (with Holm-Bonferroni correction)</b> |                                       |                           |                   |
|----------------------------------------------------------------------|---------------------------------------|---------------------------|-------------------|
| <b>Weeks</b>                                                         | <b>Effects</b>                        | <b>Comparisons</b>        | <b><i>p</i></b>   |
| <b>1</b>                                                             | UCMS effects                          | Non-UCMS/VEH vs. UCMS/VEH | $p < 0.001^{***}$ |
|                                                                      |                                       | Non-UCMS/FLX vs. UCMS/FLX | $p < 0.001^{***}$ |
|                                                                      |                                       | Non-UCMS/ALM vs. UCMS/ALM | $p < 0.001^{***}$ |
|                                                                      | Treatments effects<br>in<br>UCMS mice | UCMS/VEH vs. UCMS/FLX     | ns                |
|                                                                      |                                       | UCMS/VEH vs. UCMS/ALM     | ns                |
|                                                                      |                                       | UCMS/FLX vs. UCMS/ALM     | ns                |
| Treatments effects<br>in non-<br>UCMS mice                           | Non-UCMS/VEH vs. Non-UCMS/FLX         | ns                        |                   |
|                                                                      | Non-UCMS/VEH vs. Non-UCMS/ALM         | ns                        |                   |
|                                                                      | Non-UCMS/FLX vs. Non-UCMS/ALM         | ns                        |                   |
| <b>2</b>                                                             | UCMS effects                          | Non-UCMS/VEH vs. UCMS/VEH | $p < 0.001^{***}$ |
|                                                                      |                                       | Non-UCMS/FLX vs. UCMS/FLX | $p < 0.001^{***}$ |
|                                                                      |                                       | Non-UCMS/ALM vs. UCMS/ALM | $p < 0.001^{***}$ |
|                                                                      | Treatments effects<br>in<br>UCMS mice | UCMS/VEH vs. UCMS/FLX     | ns                |
|                                                                      |                                       | UCMS/VEH vs. UCMS/ALM     | ns                |
|                                                                      |                                       | UCMS/FLX vs. UCMS/ALM     | ns                |
| Treatments effects<br>in non-<br>UCMS mice                           | Non-UCMS/VEH vs. Non-UCMS/FLX         | ns                        |                   |
|                                                                      | Non-UCMS/VEH vs. Non-UCMS/ALM         | ns                        |                   |
|                                                                      | Non-UCMS/FLX vs. Non-UCMS/ALM         | ns                        |                   |
| <b>3</b>                                                             | UCMS effects                          | Non-UCMS/VEH vs. UCMS/VEH | $p < 0.001^{***}$ |
|                                                                      |                                       | Non-UCMS/FLX vs. UCMS/FLX | $p < 0.001^{***}$ |
|                                                                      |                                       | Non-UCMS/ALM vs. UCMS/ALM | $p < 0.001^{***}$ |
|                                                                      | Treatments effects<br>in<br>UCMS mice | UCMS/VEH vs. UCMS/FLX     | ns                |
|                                                                      |                                       | UCMS/VEH vs. UCMS/ALM     | ns                |
|                                                                      |                                       | UCMS/FLX vs. UCMS/ALM     | ns                |
| Treatments effects<br>in non-<br>UCMS mice                           | Non-UCMS/VEH vs. Non-UCMS/FLX         | ns                        |                   |
|                                                                      | Non-UCMS/VEH vs. Non-UCMS/ALM         | ns                        |                   |
|                                                                      | Non-UCMS/FLX vs. Non-UCMS/ALM         | ns                        |                   |
| <b>4</b>                                                             | UCMS effects                          | Non-UCMS/VEH vs. UCMS/VEH | $p < 0.001^{***}$ |
|                                                                      |                                       | Non-UCMS/FLX vs. UCMS/FLX | $p < 0.001^{***}$ |
|                                                                      |                                       | Non-UCMS/ALM vs. UCMS/ALM | $p < 0.001^{***}$ |
|                                                                      | Treatments effects<br>in<br>UCMS mice | UCMS/VEH vs. UCMS/FLX     | ns                |
|                                                                      |                                       | UCMS/VEH vs. UCMS/ALM     | ns                |
|                                                                      |                                       | UCMS/FLX vs. UCMS/ALM     | ns                |
| Treatments effects<br>in non-<br>UCMS mice                           | Non-UCMS/VEH vs. Non-UCMS/FLX         | ns                        |                   |
|                                                                      | Non-UCMS/VEH vs. Non-UCMS/ALM         | ns                        |                   |
|                                                                      | Non-UCMS/FLX vs. Non-UCMS/ALM         | ns                        |                   |
| <b>5</b>                                                             | UCMS effects                          | Non-UCMS/VEH vs. UCMS/VEH | $p < 0.001^{***}$ |
|                                                                      |                                       | Non-UCMS/FLX vs. UCMS/FLX | $p < 0.001^{***}$ |
|                                                                      |                                       | Non-UCMS/ALM vs. UCMS/ALM | $p < 0.001^{***}$ |
|                                                                      | Treatments effects<br>in<br>UCMS mice | UCMS/VEH vs. UCMS/FLX     | $p < 0.001^{***}$ |
|                                                                      |                                       | UCMS/VEH vs. UCMS/ALM     | $p < 0.01^{**}$   |
|                                                                      |                                       | UCMS/FLX vs. UCMS/ALM     | ns                |
| Treatments effects<br>in non-<br>UCMS mice                           | Non-UCMS/VEH vs. Non-UCMS/FLX         | ns                        |                   |
|                                                                      | Non-UCMS/VEH vs. Non-UCMS/ALM         | ns                        |                   |
|                                                                      | Non-UCMS/FLX vs. Non-UCMS/ALM         | ns                        |                   |

ns: non-significant

|                                            |                                       |                  |              |                   |
|--------------------------------------------|---------------------------------------|------------------|--------------|-------------------|
| 6                                          | UCMS effects                          | Non-UCMS/VEH     | vs. UCMS/VEH | $p < 0.001^{***}$ |
|                                            |                                       | Non-UCMS/FLX     | vs. UCMS/FLX | $p < 0.001^{***}$ |
|                                            |                                       | Non-UCMS/ALM     | vs. UCMS/ALM | $p < 0.001^{***}$ |
|                                            | Treatments effects<br>in<br>UCMS mice | UCMS/VEH         | vs. UCMS/FLX | $p < 0.001^{***}$ |
|                                            |                                       | UCMS/VEH         | vs. UCMS/ALM | $p < 0.05^*$      |
|                                            |                                       | UCMS/FLX         | vs. UCMS/ALM | ns                |
| Treatments effects<br>in non-<br>UCMS mice | Non-UCMS/VEH                          | vs. Non-UCMS/FLX | ns           |                   |
|                                            | Non-UCMS/VEH                          | vs. Non-UCMS/ALM | ns           |                   |
|                                            | Non-UCMS/FLX                          | vs. Non-UCMS/ALM | ns           |                   |
| 7                                          | UCMS effects                          | Non-UCMS/VEH     | vs. UCMS/VEH | $p < 0.001^{***}$ |
|                                            |                                       | Non-UCMS/FLX     | vs. UCMS/FLX | $p < 0.001^{***}$ |
|                                            |                                       | Non-UCMS/ALM     | vs. UCMS/ALM | $p < 0.001^{***}$ |
|                                            | Treatments effects<br>in<br>UCMS mice | UCMS/VEH         | vs. UCMS/FLX | $p < 0.001^{***}$ |
|                                            |                                       | UCMS/VEH         | vs. UCMS/ALM | $p < 0.001^{***}$ |
|                                            |                                       | UCMS/FLX         | vs. UCMS/ALM | ns                |
| Treatments effects<br>in non-<br>UCMS mice | Non-UCMS/VEH                          | vs. Non-UCMS/FLX | ns           |                   |
|                                            | Non-UCMS/VEH                          | vs. Non-UCMS/ALM | ns           |                   |
|                                            | Non-UCMS/FLX                          | vs. Non-UCMS/ALM | ns           |                   |
| 8                                          | UCMS effects                          | Non-UCMS/VEH     | vs. UCMS/VEH | $p < 0.001^{***}$ |
|                                            |                                       | Non-UCMS/FLX     | vs. UCMS/FLX | ns                |
|                                            |                                       | Non-UCMS/ALM     | vs. UCMS/ALM | $p < 0.001^{***}$ |
|                                            | Treatments effects<br>in<br>UCMS mice | UCMS/VEH         | vs. UCMS/FLX | $p < 0.001^{***}$ |
|                                            |                                       | UCMS/VEH         | vs. UCMS/ALM | $p < 0.001^{***}$ |
|                                            |                                       | UCMS/FLX         | vs. UCMS/ALM | $p < 0.05^*$      |
| Treatments effects<br>in non-<br>UCMS mice | Non-UCMS/VEH                          | vs. Non-UCMS/FLX | ns           |                   |
|                                            | Non-UCMS/VEH                          | vs. Non-UCMS/ALM | ns           |                   |
|                                            | Non-UCMS/FLX                          | vs. Non-UCMS/ALM | ns           |                   |
| 9                                          | UCMS effects                          | Non-UCMS/VEH     | vs. UCMS/VEH | $p < 0.001^{***}$ |
|                                            |                                       | Non-UCMS/FLX     | vs. UCMS/FLX | $p < 0.001^{***}$ |
|                                            |                                       | Non-UCMS/ALM     | vs. UCMS/ALM | $p < 0.001^{***}$ |
|                                            | Treatments effects<br>in<br>UCMS mice | UCMS/VEH         | vs. UCMS/FLX | $p < 0.001^{***}$ |
|                                            |                                       | UCMS/VEH         | vs. UCMS/ALM | $p < 0.001^{***}$ |
|                                            |                                       | UCMS/FLX         | vs. UCMS/ALM | ns                |
| Treatments effects<br>in non-<br>UCMS mice | Non-UCMS/VEH                          | vs. Non-UCMS/FLX | ns           |                   |
|                                            | Non-UCMS/VEH                          | vs. Non-UCMS/ALM | ns           |                   |
|                                            | Non-UCMS/FLX                          | vs. Non-UCMS/ALM | ns           |                   |

ns: non-significant
